# Supplementary material for: SplitTester : software to identify domains responsible for functional divergence in protein family
Source: Springer Nature journal article supplement (doi:10.1186/1471-2105-6-137), 2005-06-01
Supplement: 12859_2005_462_MOESM4_ESM.pdf [file 12859_2005_462_MOESM4_ESM.pdf]

# amino acid sequence alignment

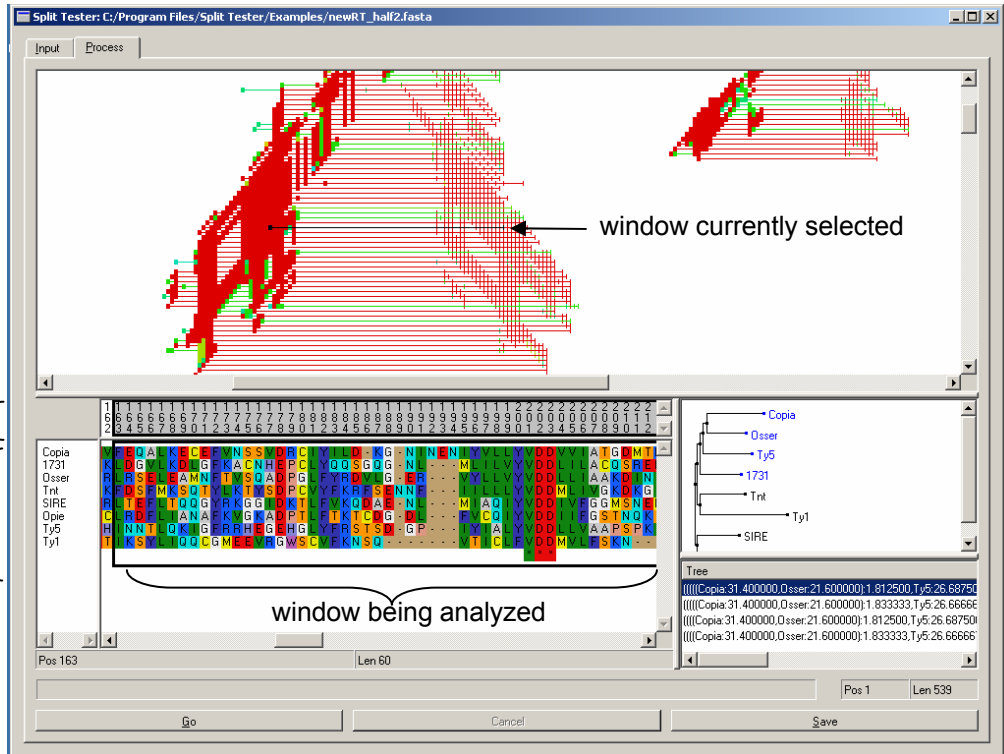

amino acid position

aligned protein sequence

window currently selected

window being analyzed

plot of increasing window size

highlighted tree in all trees below

all trees derived from window
