# Supplementary material for: SplitTester : software to identify domains responsible for functional divergence in protein family
Source: Springer Nature journal article supplement (doi:10.1186/1471-2105-6-137), 2005-06-01

**A**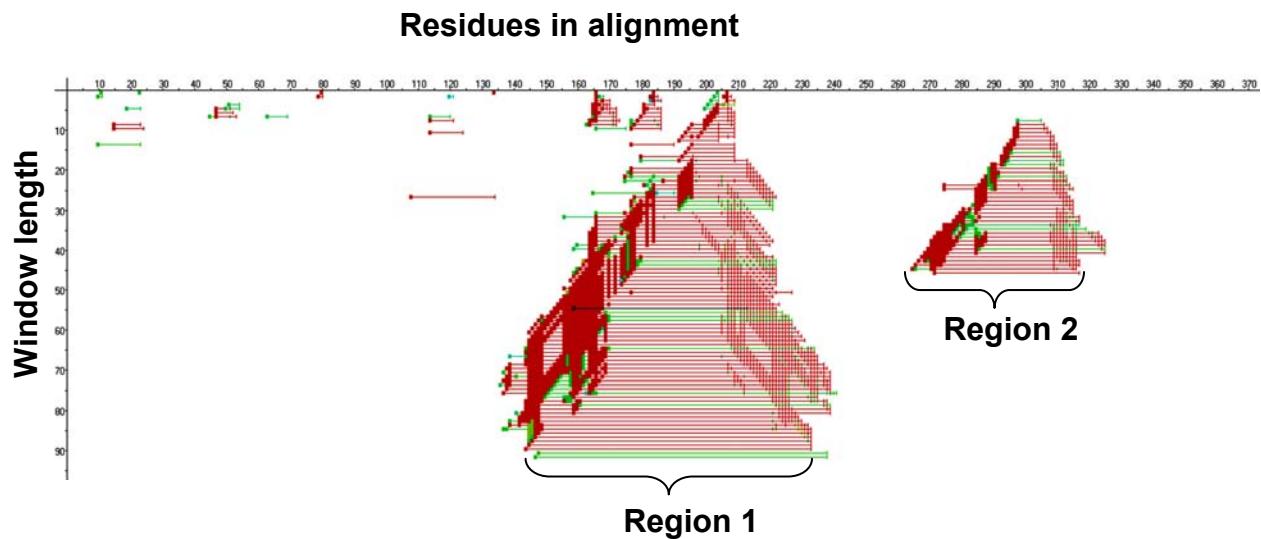**B**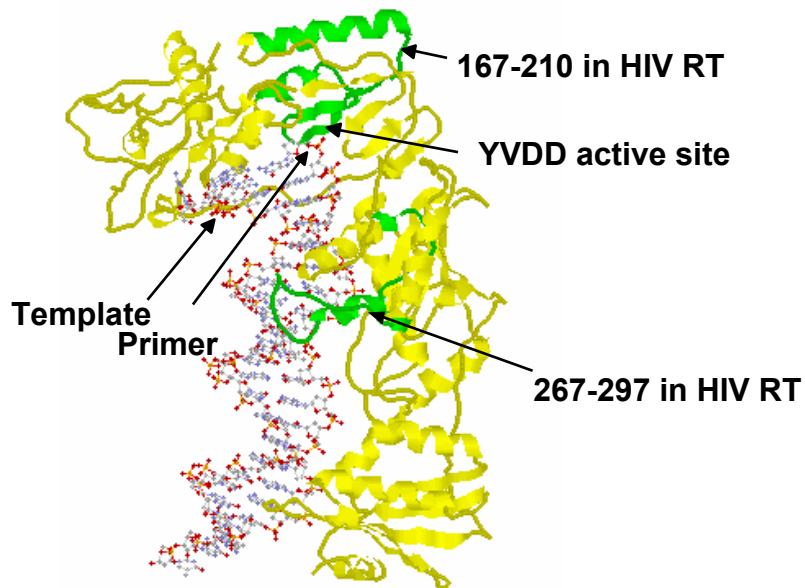

Supplement: 12859_2005_462_MOESM5_ESM.pdf [file 12859_2005_462_MOESM5_ESM.pdf]
