# Supplementary material for: SplitTester : software to identify domains responsible for functional divergence in protein family
Source: Springer Nature journal article supplement (doi:10.1186/1471-2105-6-137), 2005-06-01

### A Phylogenetic tree from full length sequence alignment

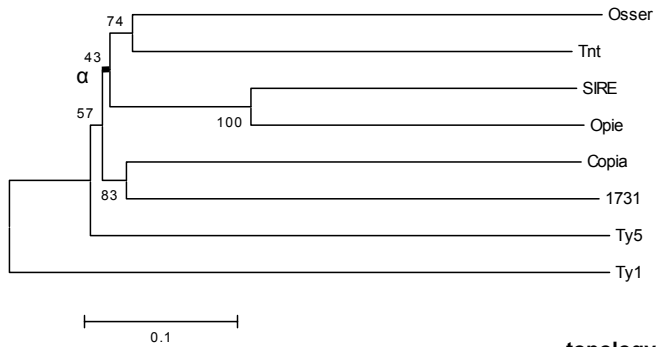

### B Split cluster from sequence alignment in window (166-215)

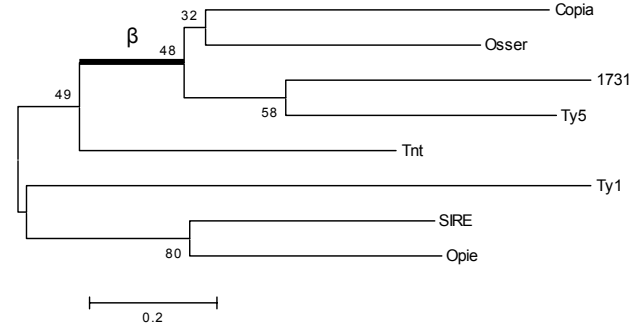

### C

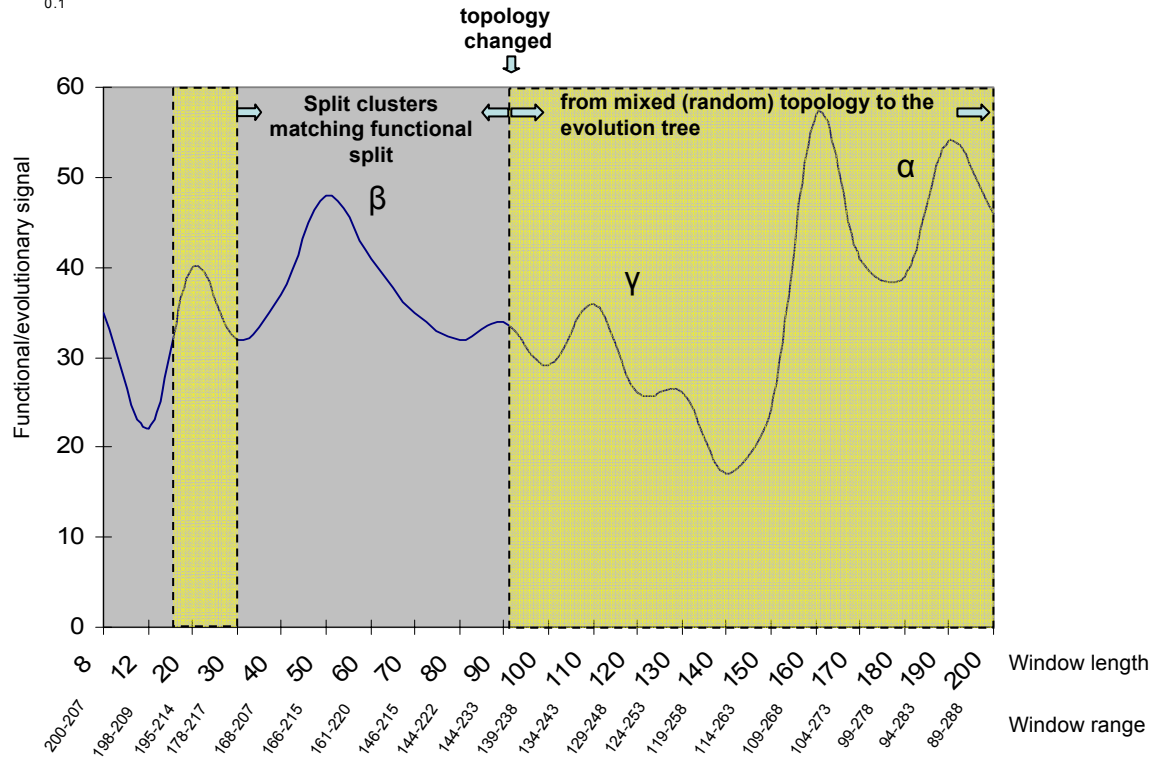

Supplement: 12859_2005_462_MOESM6_ESM.pdf [file 12859_2005_462_MOESM6_ESM.pdf]
